# Supplementary material
Source: PubMed Central journal article supplement (PMC4642222)
Supplement: bi5b00975_si_001.pdf [file bi5b00975_si_001.pdf]

## SUPPORTING TABLES

**Table S1. List of non-olfactory GPCRs containing predicted FLNa binding motif (FBM)**

| #  | UniProt ID  | GPCR                                      | Predicted FBM                                | <sup>†</sup> Site |
|----|-------------|-------------------------------------------|----------------------------------------------|-------------------|
| 1  | 5HT1F_HUMAN | 5-hydroxytryptamine receptor 1F           | <sup>355</sup> KKAFQKLVRCRC <sup>366</sup>   | Ct                |
| 2  | 5HT2A_HUMAN | 5-hydroxytryptamine receptor 2A           | <sup>385</sup> KTYRSAFSRYIQ <sup>396</sup>   | Ct                |
| 3  | 5HT2B_HUMAN | 5-hydroxytryptamine receptor 2B           | <sup>385</sup> KTFRDAFGRYIT <sup>396</sup>   | Ct                |
| 4  | ACKR3_HUMAN | Atypical chemokine receptor 3             | <sup>334</sup> YSAKTGLTKLID <sup>345</sup>   | Ct                |
| 5  | ACKR4_HUMAN | Atypical chemokine receptor 4             | <sup>308</sup> ASFKNYVMKVAK <sup>319</sup>   | Ct                |
| 6  | ACM1_HUMAN  | Muscarinic acetylcholine receptor M1      | <sup>423</sup> KAFRDTRLLLL <sup>434</sup>    | Ct                |
| 7  | AGTR1_HUMAN | Type-1 angiotensin II receptor            | <sup>311</sup> RYFLQLKYIPP <sup>322</sup>    | Ct                |
| 8  | BAI1_HUMAN  | Brain-specific angiogenesis inhibitor 1   | <sup>1244</sup> CRTATITGTLKR <sup>1255</sup> | Ct                |
|    |             |                                           | <sup>1042</sup> GHLRNRLIRKRF <sup>1053</sup> | ICL2              |
| 9  | BAI3_HUMAN  | Brain-specific angiogenesis inhibitor 3   | <sup>1207</sup> CRAATITGTLR <sup>1218</sup>  | Ct                |
|    |             |                                           | <sup>972</sup> GKIRTRLIRKRF <sup>983</sup>   | ICL2              |
| 10 | BKRB2_HUMAN | B2 bradykinin receptor                    | <sup>368</sup> GTLRTSISVERQ <sup>379</sup>   | Ct                |
| 11 | CCR1_HUMAN  | C-C chemokine receptor type 1             | <sup>310</sup> KYLRQLFHRRVA <sup>321</sup>   | Ct                |
| 12 | CCR10_HUMAN | C-C chemokine receptor type 10            | <sup>315</sup> LFRQDLRLLR <sup>326</sup>     | Ct                |
| 13 | CCR4_HUMAN  | C-C chemokine receptor type 4             | <sup>313</sup> KYILQLFKTCRG <sup>324</sup>   | Ct                |
|    |             |                                           | <sup>68</sup> KRLRSMTDVYLL <sup>79</sup>     | ICL1              |
| 14 | CCR6_HUMAN  | C-C chemokine receptor type 6             | <sup>350</sup> GRYSENISRQTS <sup>361</sup>   | Ct                |
|    |             |                                           | <sup>321</sup> QKFRNYFLKILK <sup>332</sup>   | Ct                |
|    |             |                                           | <sup>75</sup> KKARSMTDVYLL <sup>86</sup>     | ICL1              |
| 15 | CCR7_HUMAN  | C-C chemokine receptor type 7             | <sup>331</sup> VKFRNDLFKLFK <sup>342</sup>   | Ct                |
|    |             |                                           | <sup>87</sup> KRLKTM TDYLL <sup>98</sup>     | ICL1              |
| 16 | CD97_HUMAN  | CD97 antigen                              | <sup>808</sup> SKYSEFTSTTSG <sup>819</sup>   | Ct                |
| 17 | CNR1_HUMAN  | Cannabinoid receptor 1                    | <sup>448</sup> SCIKSTVKIAKV <sup>459</sup>   | Ct                |
| 18 | CXCR5_HUMAN | C-X-C chemokine receptor type 5           | <sup>327</sup> VKFRSDLRLLT <sup>338</sup>    | Ct                |
|    |             |                                           | <sup>80</sup> RQTRSSTETFLF <sup>91</sup>     | ICL1              |
| 19 | GPI19_HUMAN | Glucose-dependent insulinotropic receptor | <sup>298</sup> KKVLTSFLLFLS <sup>309</sup>   | Ct                |
| 20 | GP126_HUMAN | G-protein coupled receptor 126            | <sup>1143</sup> SKTATNIIKKSS <sup>1154</sup> | Ct                |
|    |             |                                           | <sup>1057</sup> RTLREEVLRNLR <sup>1068</sup> | ICL3              |
| 21 | GP135_HUMAN | Probable G-protein coupled receptor 135   | <sup>327</sup> VRTATTVLIMIV <sup>338</sup>   | Ct                |
|    |             |                                           | <sup>321</sup> LRFSEVVRTATT <sup>332</sup>   | Ct                |
|    |             |                                           | <sup>188</sup> RFFSSCFGIVST <sup>199</sup>   | ICL3              |

|    |             |                                                             |                                            |      |
|----|-------------|-------------------------------------------------------------|--------------------------------------------|------|
| 22 | GP149_HUMAN | Probable G-protein coupled receptor 149                     | <sup>446</sup> RNIFNAIKVEIS <sup>457</sup> | Ct   |
| 23 | GP156_HUMAN | Probable G-protein coupled receptor 156                     | <sup>377</sup> NNAKEKIVRLMS <sup>388</sup> | Ct   |
| 24 | GP162_HUMAN | Probable G-protein coupled receptor 162                     | <sup>499</sup> GFFREEITTFID <sup>510</sup> | Ct   |
| 25 | GP176_HUMAN | Probable G-protein coupled receptor 176                     | <sup>400</sup> FQAKEIFSTCLE <sup>411</sup> | Ct   |
|    |             |                                                             | <sup>70</sup> TVFKSVTNRFIK <sup>81</sup>   | ICL1 |
| 26 | GPC6A_HUMAN | G-protein coupled receptor family C group 6 member A        | <sup>843</sup> INTKSAFLKMIY <sup>854</sup> | Ct   |
| 27 | GPR22_HUMAN | Probable G-protein coupled receptor 22                      | <sup>368</sup> AFTRQKFQKVLK <sup>379</sup> | Ct   |
|    |             |                                                             | <sup>282</sup> FGVRTSVSVIIA <sup>293</sup> | ICL3 |
|    |             |                                                             | <sup>232</sup> TKILQALNIRIG <sup>243</sup> | ICL3 |
| 28 | GPR64_HUMAN | G-protein coupled receptor 64                               | <sup>880</sup> CVAKENVRKQWR <sup>891</sup> | Ct   |
| 29 | GPR85_HUMAN | Probable G-protein coupled receptor 85                      | <sup>348</sup> RCFSTLLYCRK <sup>359</sup>  | Ct   |
| 30 | GRM5_HUMAN  | Metabotropic glutamate receptor 5                           | <sup>831</sup> RNVRSFATTSTV <sup>842</sup> | Ct   |
| 31 | LGR6_HUMAN  | Leucine-rich repeat-containing G-protein coupled receptor 6 | <sup>832</sup> PHFRDDLRRRLP <sup>843</sup> | Ct   |
| 32 | LPAR2_HUMAN | Lysophosphatidic acid receptor 2                            | <sup>317</sup> QSTRESVHYTSS <sup>328</sup> | Ct   |
| 33 | MAS_HUMAN   | Proto-oncogene Mas                                          | <sup>289</sup> KRFKESLKVVLV <sup>300</sup> | Ct   |
| 34 | MAS1L_HUMAN | Mas-related G-protein coupled receptor MRG                  | <sup>323</sup> KRLKESLRVILQ <sup>334</sup> | Ct   |
| 35 | NK2R_HUMAN  | Substance-K receptor                                        | <sup>312</sup> HRFRSGFRLAFR <sup>323</sup> | Ct   |
| 36 | NPFF2_HUMAN | Neuropeptide FF receptor 2                                  | <sup>467</sup> LKAKSHVLINTS <sup>478</sup> | Ct   |
|    |             |                                                             | <sup>257</sup> LTIKTAFVIIMI <sup>268</sup> | ICL2 |
| 37 | OPN3_HUMAN  | Opsin-3                                                     | <sup>318</sup> RSLQLLCLRL <sup>329</sup>   | Ct   |
| 38 | OPRD_HUMAN  | Delta-type opioid receptor                                  | <sup>346</sup> SRAREATARERV <sup>357</sup> | Ct   |
| 39 | OX1R_HUMAN  | Orexin receptor type 1                                      | <sup>409</sup> SKISEHVVLTSV <sup>420</sup> | Ct   |
| 40 | OX2R_HUMAN  | Orexin receptor type 2                                      | <sup>418</sup> SKLSEQVVLTSI <sup>429</sup> | Ct   |
|    |             |                                                             | <sup>167</sup> KRARNISVIIWI <sup>178</sup> | ICL2 |
| 41 | P2RY4_HUMAN | P2Y purinoceptor 4                                          | <sup>329</sup> RTAASSLALVSL <sup>340</sup> | Ct   |
| 42 | PE2R1_HUMAN | Prostaglandin E2 receptor EP1 subtype                       | <sup>357</sup> AVLRQLLRLLPP <sup>368</sup> | Ct   |
|    |             |                                                             | <sup>352</sup> ILLRQAVLRQLL <sup>363</sup> | Ct   |
| 43 | PF2R_HUMAN  | Prostaglandin F2-alpha receptor                             | <sup>336</sup> SSIKNSLKVAAI <sup>347</sup> | Ct   |
| 44 | PI2R_HUMAN  | Prostacyclin receptor                                       | <sup>297</sup> KAVFQRLKLWVC <sup>308</sup> | Ct   |
| 45 | PKR1_HUMAN  | Prokineticin receptor 1                                     | <sup>343</sup> VTVKNDTVKYFK <sup>354</sup> | Ct   |
|    |             |                                                             | <sup>91</sup> KKLRNLTNLLIA <sup>102</sup>  | ICL1 |
| 46 | PKR2_HUMAN  | Prokineticin receptor 2                                     | <sup>334</sup> VTVKNNMKEYFK <sup>345</sup> | Ct   |
|    |             |                                                             | <sup>82</sup> KKLRNLTNLLIA <sup>93</sup>   | ICL1 |
| 47 | QRFPR_HUMAN | Pyroglutamylated RFamide peptide receptor                   | <sup>341</sup> KNVLSAVCYCIV <sup>352</sup> | Ct   |

|    |             |                                               |                                              |      |
|----|-------------|-----------------------------------------------|----------------------------------------------|------|
|    |             |                                               | <sup>76</sup> MRTVTNIFICSL <sup>87</sup>     | ICL1 |
| 48 | RL3R1_HUMAN | Relaxin-3 receptor 1                          | <sup>398</sup> KALKSLLWRIAS <sup>409</sup>   | Ct   |
|    |             |                                               | <sup>323</sup> KVTKSVTIVVLS <sup>334</sup>   | ICL3 |
| 49 | SSR1_HUMAN  | Somatostatin receptor type 1                  | <sup>377</sup> GVFRNGTCTSR <sup>388</sup>    | Ct   |
| 50 | SSR3_HUMAN  | Somatostatin receptor type 3                  | <sup>318</sup> YRFKQGFRRVLL <sup>329</sup>   | Ct   |
| 51 | SUCR1_HUMAN | Succinate receptor 1                          | <sup>312</sup> HNFKSLTSFSRW <sup>323</sup>   | Ct   |
| 52 | T2R13_HUMAN | Taste receptor type 2 member 13               | <sup>286</sup> AKLRQAFLLVAA <sup>297</sup>   | Ct   |
| 53 | T2R41_HUMAN | Taste receptor type 2 member 41               | <sup>291</sup> RSVFSQLLLAR <sup>302</sup>    | Ct   |
| 54 | TA2R3_HUMAN | Taste receptor type 2 member 3                | <sup>289</sup> SKLKQTFVVMRL <sup>300</sup>   | Ct   |
| 55 | TA2R8_HUMAN | Taste receptor type 2 member 8                | <sup>290</sup> NKLRQTFVRMLT <sup>301</sup>   | Ct   |
|    |             |                                               | <sup>232</sup> RAIKTMTSFIFF <sup>243</sup>   | ICL3 |
| 56 | TA2R9_HUMAN | Taste receptor type 2 member 9                | <sup>287</sup> SKLREAFKMLR <sup>298</sup>    | Ct   |
| 57 | VN1R5_HUMAN | Vomeronasal type-1 receptor 5                 | <sup>328</sup> FKTLQMLWFKYL <sup>339</sup>   | Ct   |
| 58 | AA3R_HUMAN  | Adenosine receptor A3                         | <sup>202</sup> YIIRNKLSLNL <sup>213</sup>    | ICL3 |
| 59 | ACM3_HUMAN  | Muscarinic acetylcholine receptor M3          | <sup>469</sup> LKTRSQITKRKR <sup>480</sup>   | ICL3 |
| 60 | ACM4_HUMAN  | Muscarinic acetylcholine receptor M4          | <sup>379</sup> SIARNQVRKQR <sup>390</sup>    | ICL3 |
| 61 | ACTHR_HUMAN | Adrenocorticotrophic hormone receptor         | <sup>198</sup> LLARSHTRKIST <sup>209</sup>   | ICL3 |
| 62 | ADA1A_HUMAN | Alpha-1A adrenergic receptor                  | <sup>251</sup> AKTKTHFSVRL <sup>262</sup>    | ICL3 |
|    |             |                                               | <sup>249</sup> ASAKTKTHFSVR <sup>260</sup>   | ICL3 |
|    |             |                                               | <sup>216</sup> RGLKSGLKTDKS <sup>227</sup>   | ICL3 |
| 63 | ADA1D_HUMAN | Alpha-1D adrenergic receptor                  | <sup>327</sup> HTFRSSLSVRL <sup>338</sup>    | ICL3 |
| 64 | ADA2C_HUMAN | Alpha-2C adrenergic receptor                  | <sup>361</sup> RRARSSVCRKV <sup>372</sup>    | ICL3 |
| 65 | AGTR2_HUMAN | Type-2 angiotensin II receptor                | <sup>248</sup> RITRDQVLKMAA <sup>259</sup>   | ICL3 |
| 66 | BKRB1_HUMAN | B1 bradykinin receptor                        | <sup>229</sup> LRTREEVSRTRC <sup>240</sup>   | ICL3 |
| 67 | CELR1_HUMAN | Cadherin EGF LAG seven-pass G-type receptor 1 | <sup>2648</sup> KGIVSLLRTAFL <sup>2659</sup> | ICL3 |
| 68 | CXCR4_HUMAN | C-X-C chemokine receptor type 4               | <sup>236</sup> KALKTTVILILA <sup>247</sup>   | ICL3 |
|    |             |                                               | <sup>67</sup> KKLRSMTDKYRL <sup>78</sup>     | ICL1 |
| 69 | DRD2_HUMAN  | D(2) dopamine receptor                        | <sup>349</sup> GKTRTSLKTMSR <sup>360</sup>   | ICL3 |
| 70 | DRD3_HUMAN  | D(3) dopamine receptor                        | <sup>304</sup> GRLSTSLKLGPL <sup>315</sup>   | ICL3 |
| 71 | FFAR4_HUMAN | Free fatty acid receptor 4                    | <sup>277</sup> RLFRTLFLLMVS <sup>288</sup>   | ICL3 |
| 72 | GALR1_HUMAN | Galanin receptor type 1                       | <sup>243</sup> KKTAQTVLVVVV <sup>254</sup>   | ICL3 |
|    |             |                                               | <sup>221</sup> AKVLNHLHKKLK <sup>232</sup>   | ICL3 |
| 73 | GP112_HUMAN | Probable G-protein coupled receptor 112       | <sup>2921</sup> NSVKSQIQKTRR <sup>2932</sup> | ICL3 |
| 74 | GP160_HUMAN | Probable G-protein coupled receptor 160       | <sup>238</sup> KIFLSKLIVCFL <sup>249</sup>   | ICL3 |

|     |             |                                                                        |                                            |      |
|-----|-------------|------------------------------------------------------------------------|--------------------------------------------|------|
| 75  | GP161_HUMAN | G-protein coupled receptor 161                                         | <sup>253</sup> RNAFQGVVYSAN <sup>264</sup> | ICL3 |
| 76  | GPR17_HUMAN | Uracil nucleotide/cysteinyl leukotriene receptor                       | <sup>245</sup> RSLRQGLRVEKR <sup>256</sup> | ICL3 |
| 77  | GPR34_HUMAN | Probable G-protein coupled receptor 34                                 | <sup>263</sup> TTARNSFIVLII <sup>274</sup> | ICL3 |
| 78  | GPR45_HUMAN | Probable G-protein coupled receptor 45                                 | <sup>263</sup> TKAFTTILILFV <sup>274</sup> | ICL3 |
| 79  | GPR63_HUMAN | Probable G-protein coupled receptor 63                                 | <sup>310</sup> TRAFITLILFA <sup>321</sup>  | ICL3 |
| 80  | GPR97_HUMAN | Probable G-protein coupled receptor 97                                 | <sup>474</sup> KKVLTLLGLSSL <sup>485</sup> | ICL3 |
| 81  | HCAR3_HUMAN | Hydroxycarboxylic acid receptor 3                                      | <sup>227</sup> KRAITFIMVVAI <sup>238</sup> | ICL3 |
| 82  | LPAR1_HUMAN | Lysophosphatidic acid receptor 1                                       | <sup>230</sup> GYVRQRTMRMSR <sup>241</sup> | ICL3 |
| 83  | MC5R_HUMAN  | Melanocortin receptor 5                                                | <sup>210</sup> LLARTHVKRIAA <sup>221</sup> | ICL3 |
| 84  | MRGX1_HUMAN | Mas-related G-protein coupled receptor member X1                       | <sup>213</sup> RLYVTILLTVLV <sup>224</sup> | ICL3 |
| 85  | MRGX2_HUMAN | Mas-related G-protein coupled receptor member X2                       | <sup>220</sup> RLYLITLLTVLV <sup>231</sup> | ICL3 |
| 86  | MRGX4_HUMAN | Mas-related G-protein coupled receptor member X4                       | <sup>213</sup> RLYVTILLTVLV <sup>224</sup> | ICL3 |
| 87  | MTR1A_HUMAN | Melatonin receptor type 1A                                             | <sup>235</sup> RNFVTMFVVFVL <sup>246</sup> | ICL3 |
| 88  | MTR1B_HUMAN | Melatonin receptor type 1B                                             | <sup>248</sup> RSFLTMFVVFVI <sup>259</sup> | ICL3 |
| 89  | MTR1L_HUMAN | Melatonin-related receptor                                             | <sup>234</sup> RNFLTMFVIFLL <sup>245</sup> | ICL3 |
| 90  | CXCR2_HUMAN | C-X-C chemokine receptor type 2                                        | <sup>150</sup> HATRTLQKRYL <sup>161</sup>  | ICL2 |
| 91  | EMR2_HUMAN  | EGF-like module-containing mucin-like hormone receptor-like 2          | <sup>626</sup> LTARNLTVVNYS <sup>637</sup> | ICL2 |
|     |             |                                                                        | <sup>561</sup> CKAIQNTSTSLH <sup>572</sup> | ICL1 |
| 92  | EMR3_HUMAN  | EGF-like module-containing mucin-like hormone receptor-like 3          | <sup>446</sup> LTARNLTVVNYS <sup>457</sup> | ICL2 |
| 93  | EMR4_HUMAN  | Putative EGF-like module-containing mucin-like hormone receptor-like 4 | <sup>285</sup> LKVANYTSTGRF <sup>296</sup> | ICL2 |
| 94  | GP123_HUMAN | Probable G-protein coupled receptor 123                                | <sup>107</sup> NIYKQVTKKAPL <sup>118</sup> | ICL2 |
| 95  | GP125_HUMAN | Probable G-protein coupled receptor 125                                | <sup>849</sup> NIYKQVTKKAKR <sup>860</sup> | ICL2 |
| 96  | GPR1_HUMAN  | G-protein coupled receptor 1                                           | <sup>149</sup> RTLKNSLIVIF <sup>160</sup>  | ICL2 |
| 97  | GPR56_HUMAN | G-protein coupled receptor 56                                          | <sup>502</sup> RLVVEVFGTYVP <sup>513</sup> | ICL2 |
| 98  | RGR_HUMAN   | RPE-retinal G protein-coupled receptor                                 | <sup>117</sup> YCTRSQLAWNSA <sup>128</sup> | ICL2 |
| 99  | 5HT6R_HUMAN | 5-hydroxytryptamine receptor 6                                         | <sup>58</sup> RNTSNFFLVSLF <sup>69</sup>   | ICL1 |
| 100 | CCKAR_HUMAN | Cholecystokinin receptor type A                                        | <sup>72</sup> MRTVTNIFLLSL <sup>83</sup>   | ICL1 |
| 101 | CCR5_HUMAN  | C-C chemokine receptor type 5                                          | <sup>59</sup> KRLKSMTDIYLL <sup>70</sup>   | ICL1 |
| 102 | CCR8_HUMAN  | C-C chemokine receptor type 8                                          | <sup>64</sup> KKLRSITDVYLL <sup>75</sup>   | ICL1 |
| 103 | CXCR3_HUMAN | C-X-C chemokine receptor type 3                                        | <sup>82</sup> RTALSSTDTFLL <sup>93</sup>   | ICL1 |
| 104 | FPR2_HUMAN  | N-formyl peptide receptor 2                                            | <sup>54</sup> RMTRTVTTICYL <sup>65</sup>   | ICL1 |
| 105 | GP111_HUMAN | Probable G-protein coupled receptor 111                                | <sup>474</sup> QVTKTEITYLRH <sup>485</sup> | ICL1 |
| 106 | GP113_HUMAN | Probable G-protein coupled receptor 113                                | <sup>798</sup> VVVRNKISYFRH <sup>809</sup> | ICL1 |

|     |             |                                             |                                              |      |
|-----|-------------|---------------------------------------------|----------------------------------------------|------|
| 107 | GP115_HUMAN | Probable G-protein coupled receptor 115     | <sup>429</sup> RVVVTEISYMRH <sup>440</sup>   | ICL1 |
| 108 | GP116_HUMAN | Probable G-protein coupled receptor 116     | <sup>1040</sup> SVTKNRTSYMRH <sup>1051</sup> | ICL1 |
| 109 | GPR75_HUMAN | Probable G-protein coupled receptor 75      | <sup>73</sup> RKFRTNDFMIL <sup>84</sup>      | ICL1 |
| 110 | GPR84_HUMAN | G-protein coupled receptor 84               | <sup>49</sup> PKLRTRFNLLIA <sup>60</sup>     | ICL1 |
| 111 | GPR87_HUMAN | G-protein coupled receptor 87               | <sup>68</sup> FHIRNKTSFIFY <sup>79</sup>     | ICL1 |
| 112 | LPAR6_HUMAN | Lysophosphatidic acid receptor 6            | <sup>46</sup> LKVRNETTTYMI <sup>57</sup>     | ICL1 |
| 113 | OGR1_HUMAN  | Ovarian cancer G-protein coupled receptor 1 | <sup>50</sup> IKARNELGVYLC <sup>61</sup>     | ICL1 |
| 114 | P2RY6_HUMAN | P2Y purinoceptor 6                          | <sup>55</sup> RRALTRTAVYTL <sup>66</sup>     | ICL1 |
| 115 | PD2R_HUMAN  | Prostaglandin D2 receptor                   | <sup>40</sup> LLARSGLGWCSR <sup>51</sup>     | ICL1 |
| 116 | TA2R_HUMAN  | Thromboxane A2 receptor                     | <sup>57</sup> SHTRSSFLTFLC <sup>68</sup>     | ICL1 |

<sup>C</sup>: C-terminal tail, ICL1: Intracellular loop 1, ICL2: Intracellular loop 2, ICL3: Intracellular loop 3.

**Table S2. List of olfactory GPCRs containing predicted FLNa binding motif (FBM)**

| #  | UniProt ID  | GPCR                    | Predicted FBM                                                      | <sup>†</sup> Site |
|----|-------------|-------------------------|--------------------------------------------------------------------|-------------------|
| 1  | O10J3_HUMAN | Olfactory receptor 10J3 | <sup>305</sup> RGAKNSVSLMKR <sup>316</sup>                         | Ct                |
| 2  | O10Q1_HUMAN | Olfactory receptor 10Q1 | <sup>304</sup> GALRSAIRKAA <sup>315</sup>                          | Ct                |
| 3  | O13F1_HUMAN | Olfactory receptor 13F1 | <sup>304</sup> LLIRNHFN <sup>TAFI</sup> <sup>315</sup>             | Ct                |
| 4  | O14K1_HUMAN | Olfactory receptor 14K1 | <sup>296</sup> KSALS <sup>KVLWNVR</sup> <sup>307</sup>             | Ct                |
| 5  | O51G1_HUMAN | Olfactory receptor 51G1 | <sup>299</sup> KQIRQRIKKFQ <sup>310</sup>                          | Ct                |
|    |             |                         | <sup>222</sup> LILRTVLSIASH <sup>233</sup>                         | ICL3              |
| 6  | O51T1_HUMAN | Olfactory receptor 51T1 | <sup>294</sup> YSLKTKTIRQAM <sup>305</sup>                         | Ct                |
|    |             |                         | <sup>222</sup> LILRTVLGIVAR <sup>233</sup>                         | ICL3              |
| 7  | O52A5_HUMAN | Olfactory receptor 52A5 | <sup>300</sup> KQIRDHIVKVF <sup>311</sup>                          | Ct                |
| 8  | O52E4_HUMAN | Olfactory receptor 52E4 | <sup>298</sup> KQIREQIVKIFV <sup>309</sup>                         | Ct                |
| 9  | O52E5_HUMAN | Olfactory receptor 52E5 | <sup>296</sup> KQIREQVLRILN <sup>307</sup>                         | Ct                |
| 10 | O52E6_HUMAN | Olfactory receptor 52E6 | <sup>298</sup> KHIRETVLRIF <sup>309</sup>                          | Ct                |
| 11 | O52E8_HUMAN | Olfactory receptor 52E8 | <sup>302</sup> KQIRERVLRIFL <sup>313</sup>                         | Ct                |
| 12 | O52H1_HUMAN | Olfactory receptor 52H1 | <sup>305</sup> KQIRDKVILLFS <sup>316</sup>                         | Ct                |
| 13 | O52J3_HUMAN | Olfactory receptor 52J3 | <sup>298</sup> KQIRERVLYVFT <sup>309</sup>                         | Ct                |
| 14 | O52L1_HUMAN | Olfactory receptor 52L1 | <sup>315</sup> QQIRQVLRVFT <sup>326</sup>                          | Ct                |
| 15 | O52N1_HUMAN | Olfactory receptor 52N1 | <sup>300</sup> RQVRESVIRFFL <sup>311</sup>                         | Ct                |
| 16 | O52N4_HUMAN | Olfactory receptor 52N4 | <sup>300</sup> KQIRDCVIRILS <sup>311</sup>                         | Ct                |
| 17 | O52Z1_HUMAN | Olfactory receptor 52Z1 | <sup>281</sup> KQIKDRVILLFS <sup>292</sup>                         | Ct                |
| 18 | O56B1_HUMAN | Olfactory receptor 56B1 | <sup>308</sup> RAAFQKVL <sup>FALT</sup> <sup>319</sup>             | Ct                |
| 19 | O5AL1_HUMAN | Olfactory receptor 5AL1 | <sup>317</sup> KRIIEKLCLAVK <sup>328</sup>                         | Ct                |
| 20 | O6C65_HUMAN | Olfactory receptor 6C65 | <sup>297</sup> QALREFTKKILS <sup>308</sup>                         | Ct                |
| 21 | O6C75_HUMAN | Olfactory receptor 6C75 | <sup>297</sup> QAFKSMVQKMIF <sup>308</sup>                         | Ct                |
| 22 | O6C76_HUMAN | Olfactory receptor 6C76 | <sup>296</sup> QAFKDVL <sup>RKISH</sup> <sup>307</sup>             | Ct                |
| 23 | OR2B2_HUMAN | Olfactory receptor 2B2  | <sup>321</sup> SFAKDTVLT <sup>YL</sup> <sup>332</sup>              | Ct                |
| 24 | OR2J3_HUMAN | Olfactory receptor 2J3  | <sup>93</sup> YTLRNKVV <sup>RGA</sup> <sup>304</sup>               | Ct                |
| 25 | OR2M4_HUMAN | Olfactory receptor 2M4  | <sup>298</sup> FRALQKVL <sup>KKR</sup> <sup>309</sup>              | Ct                |
| 26 | OR4K3_HUMAN | Olfactory receptor 4K3  | <sup>299</sup> RKLS <sup>SHIFKSR</sup> <sup>310</sup>              | Ct                |
| 27 | OR4KF_HUMAN | Olfactory receptor 4K15 | <sup>337</sup> VVIRNVL <sup>FLET</sup> <sup>348</sup>              | Ct                |
| 28 | OR4Q2_HUMAN | Olfactory receptor 4Q2  | <sup>300</sup> LWVRNGL <sup>TWKK</sup> <sup>311</sup>              | Ct                |
| 29 | OR5F1_HUMAN | Olfactory receptor 5F1  | <sup>299</sup> KALANVIS <sup>RKRT</sup> <sup>310</sup>             | Ct                |
| 30 | OR5H2_HUMAN | Olfactory receptor 5H2  | <sup>300</sup> KQVIDS <sup>FTK</sup> <sup>MVK</sup> <sup>311</sup> | Ct                |
| 31 | OR5M8_HUMAN | Olfactory receptor 5M8  | <sup>294</sup> KNVKEALIKELS <sup>305</sup>                         | Ct                |

|    |             |                                  |                                             |      |
|----|-------------|----------------------------------|---------------------------------------------|------|
| 32 | OR6B3_HUMAN | Olfactory receptor 6B3           | <sup>314</sup> GRLSSLELHLQ <sup>325</sup>   | Ct   |
| 33 | OR6C3_HUMAN | Olfactory receptor 6C3           | <sup>296</sup> QAFKNVVHKVVF <sup>307</sup>  | Ct   |
| 34 | OR6C4_HUMAN | Olfactory receptor 6C4           | <sup>297</sup> QAFKDSVKKIVK <sup>308</sup>  | Ct   |
| 35 | OR7A2_HUMAN | Putative olfactory receptor 7A2  | <sup>299</sup> KGALTQFFRGKQ <sup>310</sup>  | Ct   |
| 36 | OR8A1_HUMAN | Olfactory receptor 8A1           | <sup>314</sup> KAAVQKTLRGKL <sup>325</sup>  | Ct   |
| 37 | OR8J1_HUMAN | Olfactory receptor 8J1           | <sup>299</sup> KTALQRFMTNLC <sup>310</sup>  | Ct   |
| 38 | OR8J2_HUMAN | Olfactory receptor 8J2           | <sup>295</sup> KNVKDALKRFLD <sup>306</sup>  | Ct   |
| 39 | O10A4_HUMAN | Olfactory receptor 10A4          | <sup>220</sup> VRILSTIFRMPS <sup>231</sup>  | ICL3 |
| 40 | O10AG_HUMAN | Olfactory receptor 10AG1         | <sup>211</sup> KIISNILKLSSA <sup>222</sup>  | ICL3 |
|    |             |                                  | <sup>210</sup> GKIISNILKLSS <sup>221</sup>  | ICL3 |
| 41 | O10D3_HUMAN | Putative olfactory receptor 10D3 | <sup>220</sup> RITISILSIRTT <sup>231</sup>  | ICL3 |
| 42 | O10K1_HUMAN | Olfactory receptor 10K1          | <sup>219</sup> IRIISAILKIPS <sup>230</sup>  | ICL3 |
| 43 | O11H4_HUMAN | Olfactory receptor 11H4          | <sup>223</sup> YILRSYILLTA <sup>234</sup>   | ICL3 |
| 44 | O14CZ_HUMAN | Olfactory receptor 14C36         | <sup>211</sup> FIIRSYIHIFST <sup>222</sup>  | ICL3 |
| 45 | O14J1_HUMAN | Olfactory receptor 14J1          | <sup>217</sup> IRIFSTVLRIPS <sup>228</sup>  | ICL3 |
| 46 | O51A4_HUMAN | Olfactory receptor 51A4          | <sup>221</sup> LILKTVLGIASK <sup>232</sup>  | ICL3 |
| 47 | O51A7_HUMAN | Olfactory receptor 51A7          | <sup>219</sup> LILKTILSIASL <sup>230</sup>  | ICL3 |
| 48 | O51B5_HUMAN | Olfactory receptor 51B5          | <sup>218</sup> LILKTVLSIASR <sup>229</sup>  | ICL3 |
| 49 | O51E1_HUMAN | Olfactory receptor 51E1          | <sup>222</sup> LILKTVLGLTRE <sup>233</sup>  | ICL3 |
| 50 | O51F2_HUMAN | Olfactory receptor 51F2          | <sup>234</sup> LIIRSVLSIASS <sup>245</sup>  | ICL3 |
| 51 | O51G2_HUMAN | Olfactory receptor 51G2          | <sup>225</sup> LILRTVLSIASR <sup>236</sup>  | ICL3 |
| 52 | O51H1_HUMAN | Putative olfactory receptor 51H1 | <sup>222</sup> LTLKTVLGIIVSR <sup>233</sup> | ICL3 |
| 53 | O51Q1_HUMAN | Olfactory receptor 51Q1          | <sup>222</sup> LILKNILGTATW <sup>233</sup>  | ICL3 |
| 54 | O51V1_HUMAN | Olfactory receptor 51V1          | <sup>229</sup> LILKSVLAVASQ <sup>240</sup>  | ICL3 |
| 55 | O5AC2_HUMAN | Olfactory receptor 5AC2          | <sup>222</sup> RVLFDILKKKSE <sup>233</sup>  | ICL3 |
| 56 | OR1E1_HUMAN | Olfactory receptor 1E1           | <sup>219</sup> ARIVSSILKVPS <sup>230</sup>  | ICL3 |
| 57 | OR1E2_HUMAN | Olfactory receptor 1E2           | <sup>228</sup> ARIVSSILKVPS <sup>239</sup>  | ICL3 |
| 58 | OR1L8_HUMAN | Olfactory receptor 1L8           | <sup>220</sup> IRILTTVLKIPS <sup>231</sup>  | ICL3 |
| 59 | OR1P1_HUMAN | Olfactory receptor 1P1           | <sup>232</sup> IRIVSAILRAPS <sup>243</sup>  | ICL3 |
| 60 | OR2F2_HUMAN | Olfactory receptor 2F2           | <sup>220</sup> RIISTILKIQR <sup>231</sup>   | ICL3 |
| 61 | OR2G2_HUMAN | Olfactory receptor 2G2           | <sup>229</sup> LRIKSATRRQKA <sup>240</sup>  | ICL3 |
| 62 | OR4E1_HUMAN | Olfactory receptor 4E1           | <sup>228</sup> VSLRQQISKGKW <sup>239</sup>  | ICL3 |
| 63 | OR5A2_HUMAN | Olfactory receptor 5A2           | <sup>227</sup> VKISSATGRTKA <sup>238</sup>  | ICL3 |
| 64 | OR6C6_HUMAN | Olfactory receptor 6C6           | <sup>218</sup> CIIKTILKFSSA <sup>229</sup>  | ICL3 |
| 65 | OR6K3_HUMAN | Olfactory receptor 6K3           | <sup>234</sup> VRIVTVILRIPS <sup>245</sup>  | ICL3 |

|    |             |                                  |                                            |      |
|----|-------------|----------------------------------|--------------------------------------------|------|
| 66 | OR7C1_HUMAN | Olfactory receptor 7C1           | <sup>220</sup> KIVFSILRISSA <sup>231</sup> | ICL3 |
| 67 | OR7D2_HUMAN | Olfactory receptor 7D2           | <sup>219</sup> SRIASSIRKMSS <sup>230</sup> | ICL3 |
| 68 | OR7G3_HUMAN | Olfactory receptor 7G3           | <sup>219</sup> TRIVSSVMKIPS <sup>230</sup> | ICL3 |
| 69 | OR8S1_HUMAN | Olfactory receptor 8S1           | <sup>220</sup> RIISTILSISST <sup>231</sup> | ICL3 |
| 70 | OR9I1_HUMAN | Olfactory receptor 9I1           | <sup>220</sup> LIKTILKVKSS <sup>231</sup>  | ICL3 |
| 71 | O51I2_HUMAN | Olfactory receptor 51I2          | <sup>130</sup> LRyatVLTTEVI <sup>141</sup> | ICL2 |
| 72 | O52A4_HUMAN | Putative olfactory receptor 52A4 | <sup>139</sup> VFTRQLVTYIVV <sup>150</sup> | ICL2 |
| 73 | OR1L1_HUMAN | Olfactory receptor 1L1           | <sup>97</sup> LAIRSDTRLQTP <sup>108</sup>  | ICL1 |

<sup>C</sup>: C-terminal tail, ICL1: Intracellular loop 1, ICL2: Intracellular loop 2, ICL3: Intracellular loop 3.
